# Supplementary material for: Looking back to move forward: a twenty-year audit of herpes zoster in Asia-Pacific
Source: Springer Nature journal article supplement (doi:10.1186/s12879-017-2198-y), 2017-03-15
Supplement: MOESM1 [file 12145346]

**Appendix.** Alternative approaches to treating herpes zoster and herpetic neuralgia

| Modality                                                                           | Effector                                                                                     | Study method<br>(Number of HZ patients)                                                           | Reported efficacy of evaluated effector against HZ<br>and/or herpetic neuralgia                                  | Country <sup>a</sup><br>(Source)             |
|------------------------------------------------------------------------------------|----------------------------------------------------------------------------------------------|---------------------------------------------------------------------------------------------------|------------------------------------------------------------------------------------------------------------------|----------------------------------------------|
| Botanic                                                                            | <i>Undaria pinnatifida</i>                                                                   | Effect of extract of <i>U. pinnatifida</i> (GFS) in 21 patients with herpetic infections (n=2)    | GFS inhibited herpes virus reactivation and increased healing rate of herpetic outbreaks                         | Australia<br>(Cooper 2002) <sup>1</sup>      |
|                                                                                    | TCM herbs (unspecified decoction)                                                            | Randomised to TCM vs. western medicine: 1994–1995 (NR)                                            | TCM better than western medicine (TC 93.3% vs. 85.8%, effective 75.5% vs. 52.2%)                                 | China<br>(Chen 2007) <sup>2</sup>            |
|                                                                                    | <i>Ganoderma lucidum</i>                                                                     | Effect of <i>G. lucidum</i> on acute HZ pain and PHN (n=4)                                        | Decreased severe HZ pain and intractable PHN                                                                     | Japan (Hijikata 1998) <sup>3</sup>           |
|                                                                                    |                                                                                              | Effect of formula containing <i>G. lucidum</i> on acute HZ pain (n=5)                             | Rapid pain relief in a few days, almost complete by 10 days, no PHN through 1 year follow-up                     | Japan<br>(Hijikata 2005) <sup>4</sup>        |
|                                                                                    | Keishikajutsu-buto & Bushi-matsu                                                             | Effect of two herbs in PHN aggravated by cold environment (n=15)                                  | Treatment is a promising way to treat intractable PHN                                                            | Japan<br>(Nakanishi 2012) <sup>5</sup>       |
|                                                                                    | Keisi-bushi-to & Hachimi-jio-gan                                                             | Effect of oriental herbal medicines on HZ pain (n=8)                                              | Pain symptoms relieved in 2/3 treated with Keisi-bushi-to and 4/5 with Hachimi-jio-gan granules                  | Japan<br>(Aki 2002) <sup>6</sup>             |
|                                                                                    | Yokukansan                                                                                   | Effect of Yokukansan in HZ pain and PHN (NR)                                                      | Yokukansan more effective than conventional analgesics                                                           | Japan (Nakamura 2009) <sup>7</sup>           |
|                                                                                    | Sairei-to                                                                                    | Pain relief in HZ (NR)                                                                            | Analgesic efficacy 76.8%                                                                                         | Japan (Shukuwa 2002) <sup>8</sup>            |
|                                                                                    | <i>Clinacanthus nutans</i>                                                                   | Systematic review and meta-analysis of 4 RCTs (n=126)                                             | Relative risk of 3.2 for 3-day full crusting (IQR 0.97–10.58), suggests beneficial effect in HZ                  | Thailand<br>(Kongkaew 2011) <sup>9</sup>     |
|                                                                                    |                                                                                              | Randomised to <i>C. nutans</i> 5% extract vs. placebo (n=51)                                      | Faster healing and pain reduction vs. placebo (P<0.01), with no side effects.                                    | Thailand<br>(Sangkitporn 1995) <sup>10</sup> |
| Randomised to <i>C. nutans</i> 5% cream vs. placebo (n=75)                         |                                                                                              | Faster lesion healing (27.5% vs. 8.5%)                                                            | Thailand<br>(Charuwichitratana 1996) <sup>11</sup>                                                               |                                              |
| <i>Radix isatidis</i>                                                              | <i>R. isatidis</i> prophylaxis against HZ in multiple myeloma treated with bortezomib (n=30) | Higher incidence of VZV reactivation without prophylaxis (25.0% vs. 0.0%, P=0.003)                | China<br>(Guo 2011) <sup>12</sup>                                                                                |                                              |
| Molecular                                                                          | Hyperbaric oxygen (HBO <sub>2</sub> )                                                        | Randomised to HBO <sub>2</sub> + medication vs. medication (n=68)                                 | HBO <sub>2</sub> enhanced efficacy (97.2% vs. 81.3%, P<0.05), faster healing, lower PHN rate and less depression | China<br>(Peng 2012) <sup>13</sup>           |
|                                                                                    | Vitamin C                                                                                    | Effect of IV vitamin C in refractory HZ (n=1)                                                     | Treatment immediately reduced pain                                                                               | Korea (Byun 2011) <sup>14</sup>              |
|                                                                                    | Bee venom                                                                                    | Effect of bee venom in refractory PHN (n=1)                                                       | Self-reported pain score fell from 8/10 to 2/10, with no adverse effects or rebound through 1 year follow-up     | Korea<br>(Lee 2014) <sup>15</sup>            |
| Mechanic                                                                           | Intramuscular stimulation (IMS)                                                              | Effect of IMS in treating PHN (n=4)                                                               | Self-reported pain decreased by more than half                                                                   | Korea (Jung 2010) <sup>16</sup>              |
|                                                                                    | Acupuncture (AP)                                                                             | Meta-analysis of 10 RCTs (NR)                                                                     | Superior clinical cure and analgesia to western medicine (P<0.01), more high-quality studies needed              | China<br>(Yu 2007) <sup>17</sup>             |
|                                                                                    |                                                                                              | Randomised to AP vs. ibuprofen + famotidine + IV vitamins B <sub>1</sub> & B <sub>12</sub> (n=24) | Treatment superior (TE 91.6% vs. 83.3%)                                                                          | China<br>(Fang 2011) <sup>18</sup>           |
|                                                                                    |                                                                                              | Case series of nerve cell puncturing (n=48)                                                       | Good therapeutic results                                                                                         | China (Ni 2008) <sup>19</sup>                |
|                                                                                    | Cupping                                                                                      | Meta-analysis of 135 RCTs: <sup>b</sup> 1992–2010 (NR)                                            | Potential effect, but need more well designed trials                                                             | Australia (Cao 2012) <sup>20</sup>           |
| Systematic review of 73 RCTs, 22 trials, 373 case series, 82 cases: 1959–2008 (NR) |                                                                                              | Potential benefit but more rigorously designed trials warranted                                   | China<br>(Cao 2010) <sup>21</sup>                                                                                |                                              |

|                                  |                                                                        |                                                                                                       |                                                                                                                            |                                     |
|----------------------------------|------------------------------------------------------------------------|-------------------------------------------------------------------------------------------------------|----------------------------------------------------------------------------------------------------------------------------|-------------------------------------|
|                                  | Blood letting                                                          | Systematic review of 98,526 cases involving 261 diseases (NR)                                         | Bleeding therapy has evident advantages for treating HZ                                                                    | China (Chen 2009) <sup>22</sup>     |
|                                  |                                                                        | Case study of bleeding point ear apex (n=1)                                                           | Immediate relief of most pain, two treatments cured                                                                        | China (Wang 2006) <sup>23</sup>     |
| <b>Energetic</b>                 | Far-infrared radiation                                                 | Effect of far-infrared radiation in HZ (n=50)                                                         | Superior healing and pain relief vs. control                                                                               | China (Zhang 1994) <sup>24</sup>    |
|                                  | CT-guided radiofrequency (RF) thermocoagulation                        | Effect of CT-guided RF dorsal root ganglion thermocoagulation in intractable PHN (n=16)               | Hyperalgesia disappeared, immediate self-reported pain scores fell from 7–9/10 to 2–3/10, with no relapse                  | China (Huang 2008) <sup>25</sup>    |
|                                  | Laser                                                                  | Effect of combi laser therapy in PHN (n=50)                                                           | Cure 88.0% after 20 exposures, relief 10% included four HZ ophthalmicus cases                                              | India (Mittal 1996) <sup>26</sup>   |
|                                  |                                                                        | Case-control study of adding He-Ne laser to medication in HZ keratitis (NR)                           | Laser enhanced efficacy with accelerated healing and better pain relief (P<0.05)                                           | China (Li 2012) <sup>27</sup>       |
|                                  | Temporary electric spinal cord stimulation (SCS)                       | Effect of adding SCS to epidural block in refractory PHN (n=14)                                       | SCS reduced self-reported pain and spared epidural anaesthesia                                                             | Japan (Moriyama 2009) <sup>28</sup> |
|                                  | Light-emitting diode (LED)                                             | Randomised to LED + IV acyclovir + analgesia vs. IV acyclovir + analgesia (n=60)                      | LED accelerated relief of acute pain (1.4 vs. 1.8 weeks, P<0.05) but had no effect on onset of PHN                         | Korea (Jung 2013) <sup>29</sup>     |
|                                  |                                                                        | HZ ophthalmicus patients randomised to 830 nm LED vs. oral famciclovir (n=28)                         | LED accelerated healing (13.1 days vs. 15.9 days, P=0.006) and reduced self-reported pain from day 4                       | Korea (Park 2013) <sup>30</sup>     |
| Ultrasound (US)-guided pulsed RF | Effect of US-guided pulsed RF in refractory facial HZ (n=1)            | Pain reduced, persisting through 6-months follow-up, with no need for further management              | Korea (Lim 2013) <sup>31</sup>                                                                                             |                                     |
| Scrambler                        | Effect of scrambler therapy in refractory PHN (n=3)                    | Self-reported pain decreased by 50% after 10 sessions                                                 | Korea (Ko 2013) <sup>32</sup>                                                                                              |                                     |
| <b>Combined</b>                  | AP + blood-letting with cupping & surround needling                    | Randomised to combination vs. oral + topical aciclovir (n=240)                                        | Combination more effective (92.5% vs. 55.8%, P<0.01), with more rapid pain relief and healing                              | China (Huo. 2007) <sup>33</sup>     |
|                                  | Acupoint selection + AP + cupping                                      | Randomised to combination at differential acupoints vs. affected areas (n=86)                         | Targeted-therapy superior (cure & effective 93.0% vs. 67.4%, P<0.01), lower PHN rate (2.3% vs. 14.0%)                      | China (Pan 2011) <sup>34</sup>      |
|                                  | AP + electro-AP, moxibustion hot needle, tapping + cupping             | Randomised to various mechanic TCM modalities vs. western medicine (n=500)                            | No significant difference in efficacy, but TCM more cost-effective                                                         | China (Li 2012) <sup>35</sup>       |
|                                  | Electro AP + AP or cotton moxibustion or hot needle or tapping/cupping | Randomised to various TCM modalities vs. oral valaciclovir + vitamin B <sub>1</sub> (n=189)           | No significant differences in clinical cure efficacy but TCM significantly reduced pain from post-treatment day 7 (P<0.05) | China (Huang 2012) <sup>36</sup>    |
|                                  | Collateral-pricking + 'healthy energy strengthening'                   | Retrospective comparison of collateral pricking vs. aciclovir (n=66)                                  | Treatment superior (cure 95.6% vs. 75.6%, P<0.05)                                                                          | China (Yu 2005) <sup>37</sup>       |
|                                  | Needling + moxibustion                                                 | Randomised to moxibustion at area of surround needling vs. needling only (n=72)                       | Treatment more effective (97.4% vs. 85.3%, P<0.05), faster healing and reduced residual neuralgia                          | China (Zhang 2007) <sup>38</sup>    |
|                                  | AP + point injection                                                   | Effect of combination in PHN (n=30)                                                                   | Combination has curative effect on PHN (TE 90%)                                                                            | China (Wang 2008) <sup>39</sup>     |
|                                  | Needling + thin-cotton moxibustion                                     | Randomised to combination vs. oral + topical aciclovir (n=80)                                         | Treatment superior (effective 78.6% vs. 39.5%, P<0.05)                                                                     | China (Tian 2011) <sup>40</sup>     |
|                                  | Plum-blossom needle tapping + moxibustion                              | Randomised to combination vs. topical aciclovir + oral valaciclovir + vitamin B <sub>12</sub> (n=120) | Treatment superior (cure 80.0% vs. 45.0%, P<0.10; TE 98.3% vs. 71.7%, P<0.05) and faster, recurrence 1.6% vs. 13.3%        | China (Yang 2012) <sup>41</sup>     |
| Percussopunctato + cupping       | Effect of combination in HZ and PHN (n=33)                             | TE 100%: cure 60.6%, good effect 33.3%, effect 6%                                                     | China (Han 2003) <sup>42</sup>                                                                                             |                                     |

|                                                                                      |                                                                                                                          |                                                                                                                                                    |                                   |
|--------------------------------------------------------------------------------------|--------------------------------------------------------------------------------------------------------------------------|----------------------------------------------------------------------------------------------------------------------------------------------------|-----------------------------------|
| Ear tapping & pressing + acupoint vitamin B <sub>12</sub> injection                  | Randomised to combination vs. standard western medicine (n=116)                                                          | Cure 60% vs. 28.6%, effective 83.3% vs. 50.0%, (P<0.05), faster pain relief and cessation (P<0.01)                                                 | China (Wu 2007) <sup>43</sup>     |
| Blood-letting & cupping + UV irradiation                                             | Randomised to combination vs. standard therapy including aciclovir (n=130)                                               | Higher and faster cure & effective rates (respectively, 76.9% vs. 38.5% & 90.8% vs. 66.2%, P<0.01), lower PHN rate (3.1% vs. 12.3%, P<0.05)        | China (Ouyang 2009) <sup>44</sup> |
| Electro-AP + needling                                                                | Randomised to combination vs. valaciclovir + vitamin B <sub>1</sub> (n=80)                                               | Combination superior (cure 75.0% vs. 37.5%, effective 92.5% vs. 67.5, with faster healing (P<0.01)                                                 | China (Li 2009) <sup>45</sup>     |
| Electro-AP + blood-letting & cupping                                                 | Randomised to combination vs. valaciclovir + indomethacin + vitamins B <sub>1</sub> & B <sub>12</sub> (n=53)             | Cure & effective 96.8% vs. 81.8% (P<0.05)                                                                                                          | China (Liu 2009) <sup>46</sup>    |
| Electro-AP + collateral pricking & cupping                                           | Randomised to combination vs. oral valaciclovir + indomethacin (n=53)                                                    | Combination superior (cure & effective 93.5% vs. 72.7%, P<0.01)                                                                                    | China (Liu 2013) <sup>47</sup>    |
| AP & cupping + blood letting                                                         | Case report (n=1)                                                                                                        | One treatment reduced pain and five cured HZ, with no residual pain or sequelae at 3 months                                                        | China (Hu 2001) <sup>48</sup>     |
| Electronic meridian detection + blood-letting & cupping                              | Randomised to combination vs. oral acyclovir (n=200)                                                                     | Treatment superior (TE 100% vs. 60%, P<0.001), faster pain relief and healing, PHN rate 0.0% vs. 26%                                               | China (Dai 2011) <sup>49</sup>    |
| Variable frequency electro-AP + herbal moxibustion                                   | Randomised to combination vs. ibuprofen + vitamins B <sub>1</sub> & E (n=37)                                             | Treatment superior to medication (effective 94.44% vs. 73.68%, P<0.05)                                                                             | China (Wang 2012) <sup>50</sup>   |
| Swift needling + medication                                                          | Randomised to fire-AP + oral valaciclovir + vitamin B <sub>1</sub> vs. oral valaciclovir + vitamin B <sub>1</sub> (n=79) | Combination superior (TE 95.1% vs. 89.5%, P<0.05)                                                                                                  | China (Fan 2013) <sup>51</sup>    |
| Subcutaneous needling + laser                                                        | PHN patients randomised to electro-AP + laser vs. electro-AP (n=102)                                                     | Combination superior (TE 94.1% vs. 68.6%, recovery 56.9% vs. 35.3%, P<0.05), with faster action and cure and less relapse (6.9% vs. 44.4%, P<0.05) | China (Guo 2014) <sup>52</sup>    |
| Encircled AP + valaciclovir                                                          | Effect of encircled AP + oral valaciclovir vs. oral valaciclovir (n=60)                                                  | Combination superior, faster healing and pain relief                                                                                               | China (He 2007) <sup>53</sup>     |
| Surround AP + He-Ne laser                                                            | Randomised to surround AP + IV aciclovir + He-Ne laser vs. IV & topical aciclovir (n=60)                                 | Combination superior in effective rate, healing, pain relief and time to cure (P<0.05)                                                             | China (Song 2013) <sup>54</sup>   |
| TCM + mecobalamin                                                                    | PHN patients randomised to mecobalamin or TCM vs, mecobalamin + TCM (n=160)                                              | Combination superior (effective 90.9% vs. 72% mecobalamin & 70.9% TCM, P<0.01)                                                                     | China (Tian 2005) <sup>55</sup>   |
| Linear polarised near-infrared light (LPIR) + fentanyl patch                         | Randomised to combination vs. LPIR or fentanyl patch (n=30)                                                              | Combination superior (80% vs. 60% & 70%, P<0.05), self-reported pain fell from baseline (P<0.05)                                                   | China (Wang 2007) <sup>56</sup>   |
| Electro-AP + herbal medicine                                                         | Randomised to combination vs. oral + topical aciclovir + mecobalamin (n=62)                                              | Combination superior (P<0.01)                                                                                                                      | China (Wang 2012) <sup>57</sup>   |
| Oral TCM + AP, moxibustion, corticosteroids, antivirals, analgesia and trophic nerve | Randomised to combination vs. conventional antiviral and analgesic agents ± corticosteroids ± AP & moxibustion (n=128)   | Composite treatment with oral TCM significantly eased self-reported pain and improved quality of life                                              | China (Xie 2003) <sup>58</sup>    |

AP acupuncture, HZ herpes zoster, NR not reported, UV ultraviolet, PHN post-herpetic neuralgia, HBO<sub>2</sub> hyperbaric oxygen, RCT randomised controlled trial, TCM traditional Chinese medicine, LED light-emitting diode, IV intravenous, US ultrasound, IQR interquartile range, TC total cure, TE total effective, RF radiofrequency, CT computed tomography, SCS spinal cord stimulation.

<sup>a</sup> Main affiliation of first author.

<sup>b</sup> Included cupping types: wet, retained, moving, flash, medicinal, needle, combined.

## References

1. Cooper R, Dragar C, Elliot K, Fitton JH, Godwin J, Thompson K. GFS, a preparation of Tasmanian *Undaria pinnatifida* is associated with healing and inhibition of reactivation of Herpes. *BMC Complement Altern Med.* 2002;2:11.
2. Chen HM. Zoster Chinese medicine treatment. *Zhonghua Shi Yan He Lin Chuang Bing Du Xue Za Zhi.* 2007;21:285-7.
3. Hijikata Y, Yamada S. Effect of *Ganoderma lucidum* on postherpetic neuralgia. *Am J Chin Med.* 1998;26:375-81.
4. Hijikata Y, Yasuhara A, Sahashi Y. Effect of an herbal formula containing *Ganoderma lucidum* on reduction of herpes zoster pain: a pilot clinical trial. *Am J Chin Med.* 2005;33:517-23.
5. Nakanishi M, Arimitsu J, Kageyama M, Otsuka S, Inoue T, Nishida S, et al. Efficacy of traditional Japanese herbal medicines-Keishikajutsuto (TJ-18) and Bushi-matsu (TJ-3022)-against postherpetic neuralgia aggravated by self-reported cold stimulation: a case series. *J Altern Complement Med.* 2012;18:686-92.
6. Aki T, Mihara M. Treatment for herpes-zoster associated pain with oriental herbal medicines. *Nishinohon J Dermatol.* 2002;64:363-6.
7. Nakamura Y, Tajima K, Kawagoe I, Kanai M, Mitsuhata H. Efficacy of traditional herbal medicine Yokukansan on patients with neuropathic pain. *Jpn J Anesthesiol.* 2009;58:1248-55.
8. Shukuwa T, Chen WY, Kobayashi A. Statistical analysis of herpes zoster observed at Sasebo City General Hospital. *Nishinohon J Dermatol.* 2002;64:477-82.
9. Kongkaew C, Chaiyakunapruk N. Efficacy of *Clinacanthus nutans* extracts in patients with herpes infection: systematic review and meta-analysis of randomised clinical trials. *Complement Ther Med.* 2011;19:47-53.
10. Sangkitporn S, Chaiwat S, Balachandra K, Na-Ayudhaya TD, Bunjob M, Jayavasu C. Treatment of herpes zoster with *Clinacanthus nutans* (bi phaya yaw) extract. *J Med Assoc Thai.* 1995;78:624-7.
11. Charuwichitratana S, Wongrattanapasson N, Timpatanapong P, Bunjob M. Herpes zoster: treatment with *Clinacanthus nutans* cream. *Int J Dermatol.* 1996;35:665-6.
12. Guo H, Mao J, Qian X, Sun C, Sun H. Varicella-zoster virus prophylaxis with the traditional Chinese medicine radix *isatidis* (Banlangen) in patients with multiple myeloma treated with bortezomib. *J Altern Complement Med.* 2011;17:985-6.
13. Peng Z, Wang S, Huang X, Xiao P. Effect of hyperbaric oxygen therapy on patients with herpes zoster. *Undersea Hyperb Med.* 2012;39:1083-7.
14. Byun SH, Jeon Y. Administration of vitamin C in a patient with herpes zoster - A case report -. *Korean J Pain.* 2011;24:108-11.
15. Lee SM, Lim J, Lee JD, Choi DY, Lee S. Bee venom treatment for refractory postherpetic neuralgia: a case report. *J Altern Complement Med.* 2014;20:212-4.
16. Jung W, Lee BJ, Kim SS, Lee YJ. The effect of Gunn's intramuscular stimulation for postherpetic neuralgia -A report of 4 cases-. *Korean J Anesthesiol.* 2010;58:311-7.
17. Yu XM, Zhu GM, Chen YL, Fang M, Chen YN. Systematic assessment of acupuncture for treatment of herpes zoster in domestic clinical studies. *Zhongguo Zhen Jiu.* 2007;27:536-40.
18. Fang X. Clinical observation of acupuncture therapy for postherpetic neuralgia. *J Acupunct Tuina Sci.* 2011;9:113-5.
19. Ni XL. Treatment of 48 cases of herpes zoster by puncturing nerve stem. *J Acupunct Tuina Sci.* 2008;6:368-9.
20. Cao H, Li X, Liu J. An updated review of the efficacy of cupping therapy. *PLoS One.* 2012;7:e31793.
21. Cao H, Han M, Li X, Dong S, Shang Y, Wang Q, et al. Clinical research evidence of cupping therapy in China: a systematic literature review. *BMC Complement Altern Med.* 2010;10:70.
22. Chen B, Gao C, Li C, Chen ZL, Guo Y. Discussion on the suitable diseases and symptoms of bleeding therapy. *Zhongguo Zhen Jiu.* 2009;29:397-9.
23. Wang X. Treating different diseases with the point ear apex. *J Chin Med.* 2006;(82):47-8.
24. Zhang B. Observation in the treatment of herpes zoster by far-infrared radiator (TDP). *Hongwai Jishu.* 1994;16:35-6.
25. Huang B, Zhou XY, Lu YP, Zhu ZF, Hou J, Sun JL, et al. Selective percutaneous dorsal root ganglion radiofrequency thermocoagulation guided by CT scanning in treatment of post-herpetic neuralgia. *Nat Med J China.* 2008;88:885-8.

26. Mittal RR, Jassal JS, Bahl RK. Laser therapy in post herpetic neuralgia. *Indian J Dermatol Venereol Leprol.* 1996;62:229-30.
27. Li ZY, Kuang GP, Zhu JD, Wang HY, Zhu MQ, Wu ZQ. Clinical effect of He-Ne laser combined with medicine therapy on herpes zoster keratitis. *Intern Eye Sci.* 2012;12:1922-4.
28. Moriyama K. Effect of temporary spinal cord stimulation on postherpetic neuralgia in the thoracic nerve area. *Neuromodulation.* 2009;12:39-43.
29. Jung SW, Son HH, Lee YS, Lee SK. The effect of light emitting diode on acute pain and the inhibitory effects of postherpetic neuralgia in patients with herpes zoster. *Korean J Dermatol.* 2013;51:763-70.
30. Park KY, Han TY, Kim IS, Yeo IK, Kim BJ, Kim MN. The effects of 830 nm light-emitting diode therapy on acute herpes zoster ophthalmicus: A pilot study. *Ann Dermatol.* 2013;25:163-7.
31. Lim SM, Park HL, Moon HY, Kang KH, Kang H, Baek CH, et al. Ultrasound-guided infraorbital nerve pulsed radiofrequency treatment for intractable postherpetic neuralgia - a case report -. *Korean J Pain.* 2013;26:84-8.
32. Ko YK, Lee HY, Lee WY. Clinical experiences on the effect of scrambler therapy for patients with postherpetic neuralgia. *Korean J Pain.* 2013;26:98-101.
33. Huo HM, Yang XP. Observation on therapeutic effect of pricking blood therapy combined with acupuncture on herpes zoster. *Zhongguo Zhen Jiu.* 2007;27:729-30.
34. Pan H. Observation of curative effect of herpes zoster treated with acupuncture based on syndrome differentiation combined with pricking and cupping. *Zhongguo Zhen Jiu.* 2011;31:901-4.
35. Li XW, Yang YK, Xie XM, Bai LN, Zhang XS. Economic evaluation of treating herpes zoster with various methods of acupuncture and moxibustion. *J Tradit Chin Med.* 2012;32:125-8.
36. Huang GF, Zhang HX, Xu ZS, Li JW. Comparison of therapeutic effects of different types of acupuncture interventions on herpes zoster in acute stage. *Zhen Ci Yan Jiu.* 2012;37:403-8.
37. Yu F, Xu SW, Zhang W. Clinical observation on treatment of herpes zoster with collateral-pricking and healthy energy strengthening therapy. *Zhong Xi Yi Jie He Xue Bao.* 2005;3:400-1.
38. Zhang M, Qiu L, Zhang J. Observation on therapeutic effect of surround needling plus surround moxibustion on herpes zoster. *Zhongguo Zhen Jiu.* 2007;27:123-5.
39. Wang S. Treatment of 30 cases of post-herpetic neuralgia by acupuncture combined with point injection. *J Acupunct Tuina Sci.* 2008;6:182-3.
40. Tian HY, Hu J, Yang JB. Comparison on therapeutic effect between surround needling plus thin cotton moxibustion and Western medicine for herpes zoster. *Zhongguo Zhen Jiu.* 2011;31:219-22.
41. Yang JX, Xiang KW, Zhang YX. Treatment of herpes zoster with cotton sheet moxibustion: multicentral randomized controlled trial. *Zhongguo Zhen Jiu.* 2012;32:417-21.
42. Han L, Zhao S. Zoster and postherpetic neuralgia treated by percussopunctato combined with cupping therapy 33 cases. *Chin J Clin Rehab.* 2003;7:699.
43. Wu B, Jiang CH, Zhou QY, Chen QM, Shu Y, Li X. Treatment of residual neuralgia of herpes zoster by ear point taping and pressing therapy combined with acupoint-injection. *Zhongguo Zhen Jiu.* 2007;27:807-9.
44. Ouyang Q, Wei ZJ, Hou YL. Pricking blood therapy combined with ultraviolet irradiation for treatment of acute herpes zoster. *Zhongguo Zhen Jiu.* 2009;29:285-8.
45. Li X, Zhang HX, Huang GF, Feng YF, Zou R. Observation on the therapeutic effect of electroacupuncture of Jiaji (EX-B 2) plus regional encircled needling for herpes zoster. *Zhen Ci Yan Jiu.* 2009;34:125-7, 135.
46. Liu YN, Zhang HX, Huang GF, Zou R, Wei W. Observation on therapeutic effect of electroacupuncture at Jiaji (EX-B 2) combined with blood-letting and cupping on herpes zoster. *Zhongguo Zhen Jiu.* 2009;29:887-90.
47. Liu YN, Zhang HX, Huang GF, Zou R, Wei W. Treatment of herpes zoster with electroacupuncture plus collateral-pricking and cupping therapy. *J Acupunct Tuina Sci.* 2013;11:282-5.
48. Hu J. Acupuncture treatment of herpes zoster. *J Tradit Chin Med.* 2001;21:78-80.
49. Dai J, Yin AH, Zhou Y, Yin LJ. Herpes zoster treated with meridian-collateral electric information therapy combined with pricking and cupping. *Zhongguo Zhen Jiu.* 2011;31:416-9.
50. Wang ZJ, Zou Y. Observation on therapeutic effects of electroacupuncture at Jiaji (Ex-B 2) points plus herbal medicine for herpes zoster. *J Acupunct Tuina Sci.* 2012;10:313-7.

51. Fan YJ, Liu QG, Yin GZ. Therapeutic observation on swift needling with fire needle plus medication for herpes zoster. *J Acupunct Tuina Sci.* 2013;11:380-3.
52. Guo LH, Chen X, Huang P, Liang YC, Mu JP. Clinical study on Fu's subcutaneous needling with laser for postherpetic neuralgia. *J Acupunct Tuina Sci.* 2014;12:165-8.
53. He YD, Fang RH. Treatment of 60 cases of senile herpes zoster by encircled acupuncture plus valaciclovir. *J Acupunct Tuina Sci.* 2007;5:171-3.
54. Song HY, He HQ. Clinical study on surrounding acupuncture for herpes zoster. *J Acupunct Tuina Sci.* 2013;11:278-81.
55. Tian ZW, Song XF, Li WL, Feng J. Chinese medicine plus mecobalamin for postherpetic neuralgia in patients with refractory herpes zoster. *Chin J Clin Rehab.* 2005;9:24-5.
56. Wang XP, Mok MS, Li Yi, Cai JY. Combined therapy of Super Lizer and Durogesic patch in elderly patients with herpes zoster and diabetes mellitus. *J Clin Rehab Tissue Eng Res.* 2007;11:2589-92.
57. Wang CY, Fang JQ. Analysis on therapeutic effect of variable-frequency electroacupuncture combined with herbal-moxa moxibustion for post-zoster neuralgia. *Zhen Ci Yan Jiu.* 2012;37:64-6.
58. Xie JH. The quality of life of post herpes zoster neuralgia. *Chin J Clin Rehab.* 2003;7:3610-11.
